# Supplementary material for: Stronger-than-Pt hydrogen adsorption in a Au22 nanocluster for the hydrogen evolution reaction
Source: Royal Society of Chemistry journal article supplement (doi:10.1039/c8ta00461g), 2018-01-01
Supplement: c8ta00461g1.pdf [file c8ta00461g1.pdf]

## Electronic Supplementary Information

### **Stronger-than-Pt hydrogen adsorption in a Au<sub>22</sub> nanocluster for hydrogen evolution reaction**

Guoxiang Hu,<sup>†</sup> Zili Wu,<sup>‡</sup> and De-en Jiang<sup>\*,†</sup>

<sup>†</sup>Department of Chemistry, University of California, Riverside, California 92521, US

<sup>‡</sup>Chemical Sciences Division and Center for Nanophase Materials Sciences, Oak Ridge National Laboratory, Oak Ridge, Tennessee 37831, US

\*To whom correspondence should be addressed. E-mail: [djiang@ucr.edu](mailto:djiang@ucr.edu).

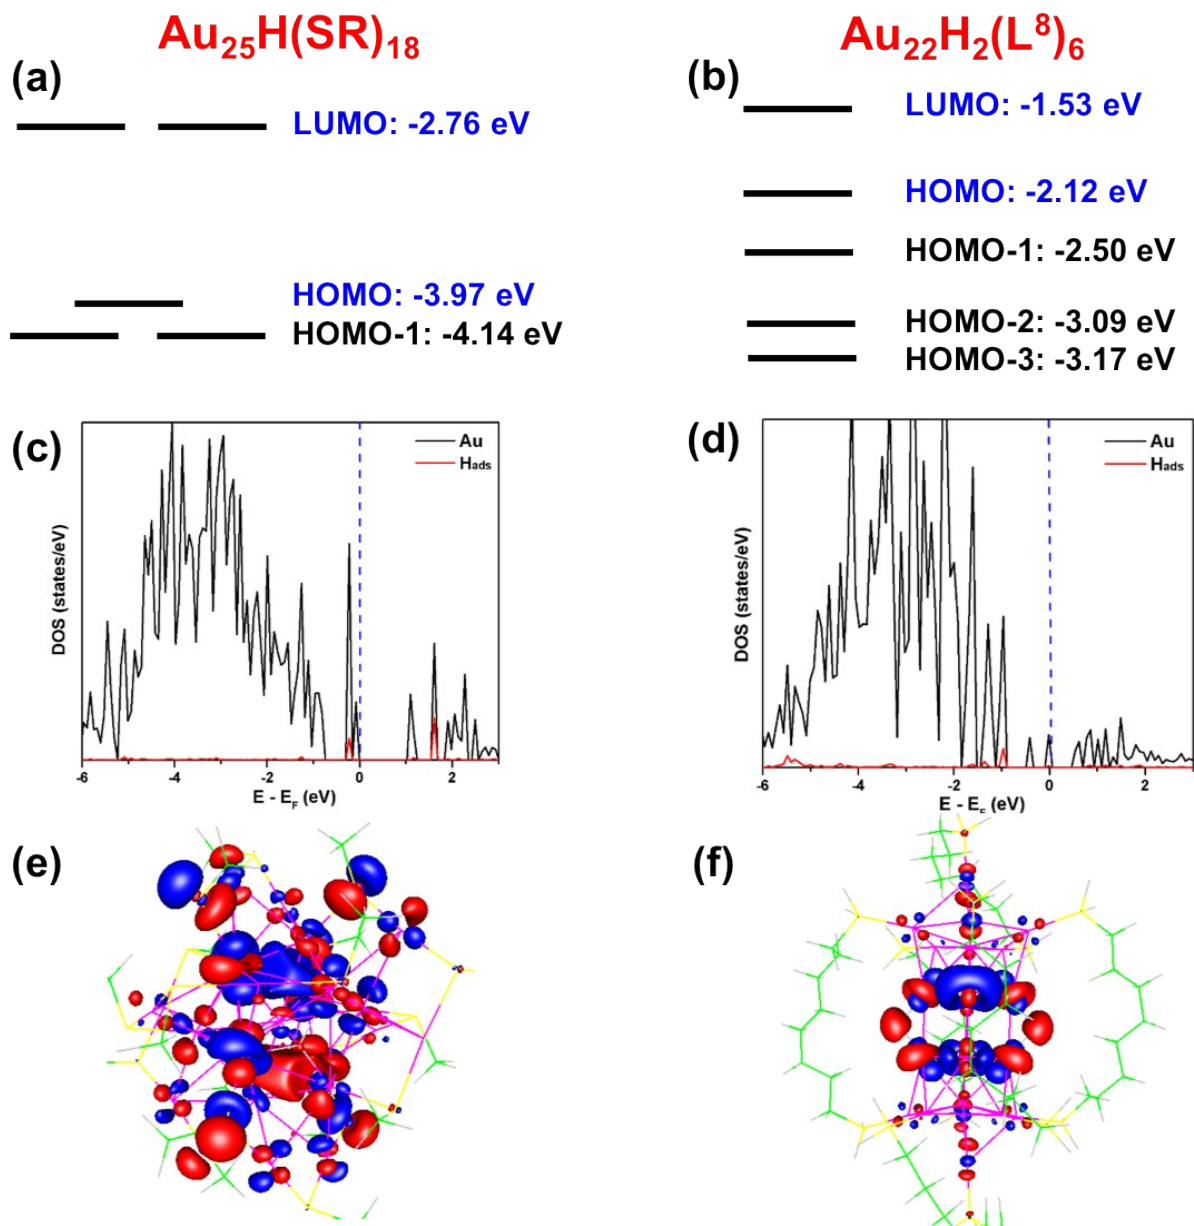

Fig. S1 The eigenvalue spectra of  $\text{Au}_{25}\text{H}(\text{SR})_{18}$  and  $\text{Au}_{22}\text{H}_2(\text{L}^8)_6$  (a and b); the local density of states (DOS) for  $\text{Au}_{25}\text{H}(\text{SR})_{18}$  and  $\text{Au}_{22}\text{H}_2(\text{L}^8)_6$  (c and d) relative to their respective HOMO levels; the HOMO-1 of  $\text{Au}_{25}\text{H}(\text{SR})_{18}$  (e), and the HOMO-2 of  $\text{Au}_{22}\text{H}_2(\text{L}^8)_6$  (f).
